# Supplementary material for: Selective Interactions of O-Methylated Flavonoid Natural Products with Human Monoamine Oxidase-A and -B
Source: PubMed Central journal article supplement (PMC7697615; doi:10.3390/molecules25225358), 2020-11-17
Supplement: molecules-25-05358-s001.pdf [file molecules-25-05358-s001.pdf]

## SUPPORTING INFORMATION

### Selective interactions of O-methylated flavonoid natural products with human monoamine oxidase-A and -B

Narayan D. Chaurasiya<sup>1,3,#</sup>, Jacob Midiwo<sup>2</sup>, Pankaj Pandey<sup>3,4</sup>, Regina N. Bwire<sup>5</sup>  
Robert J. Doerksen<sup>4</sup>, Ilias Muhammad<sup>3\*</sup> and Babu L Tekwani<sup>1,3,#\*</sup>

- <sup>1</sup> Department of Infectious Diseases, Division of Drug Discovery, Southern Research, Birmingham, AL 35205, USA; [nchaurasiya@southernresearch.org](mailto:nchaurasiya@southernresearch.org) (N.D.C)
  - <sup>2</sup> Department of Chemistry, University of Nairobi, P.O. Box 30197-00100, Nairobi, Kenya; [jmidiwo@uonbi.ac.ke](mailto:jmidiwo@uonbi.ac.ke) (J.M)
  - <sup>3</sup> National Center for Natural Products Research, Research Institute of Pharmaceutical Sciences, School of Pharmacy, University of Mississippi, University, MS 38677, USA; [ppandey@olemiss.edu](mailto:ppandey@olemiss.edu) (P.P)
  - <sup>4</sup> Department of BioMolecular Sciences, Division of Medicinal Chemistry, Research Institute of Pharmaceutical Sciences, School of Pharmacy, University of Mississippi, University, MS 38677, USA; [rjd@olemiss.edu](mailto:rjd@olemiss.edu) (R.J.D)
  - <sup>5</sup> Department of pure and applied Chemistry, Masinde Muliro University of Science and Technology, P.O. Box 190, Postcode, 50100, Kakamega, Kenya; [rbwire@mmust.ac.ke](mailto:rbwire@mmust.ac.ke)
- # Present address: N.D.C<sup>1</sup> and B.L.T<sup>1</sup>
- \* Correspondance: [btekwani@southernresearch.org](mailto:btekwani@southernresearch.org) (B.L.T); [milias@olemiss.edu](mailto:milias@olemiss.edu) (I.M)  
Tel: +1-205-581-2205 (B.L.T); +1-662-915-1051 (I.M)

TABLE OF CONTENT

| Number | Details                                                                                          |
|--------|--------------------------------------------------------------------------------------------------|
| SI 1   | <sup>1</sup> H NMR spectrum of compound <b>1</b> (3,4'-di- <i>O</i> -methylkaempferol)           |
| SI 2   | <sup>13</sup> C NMR spectrum of compound <b>1</b>                                                |
| SI 3   | <sup>1</sup> H NMR spectrum of compound <b>2</b> (2'-hydroxy-4',6'-dimethoxy-chalcone)           |
| SI 4   | <sup>13</sup> C NMR spectrum of compound <b>2</b>                                                |
| SI,5   | <sup>1</sup> H NMR spectrum of compound <b>3</b> (2',4'-dihydroxy-6'-methoxy-chalcone)           |
| SI 6   | <sup>13</sup> C NMR spectrum of compound <b>3</b>                                                |
| SI 7   | <sup>1</sup> H NMR spectrum of compound <b>4</b> (8-demethylsideroxylin)                         |
| SI 8   | <sup>13</sup> C NMR spectrum of compound <b>4</b>                                                |
| SI 9   | 2D NMR COSY spectrum of compound <b>4</b>                                                        |
| SI 10  | 2D NMR HMQC spectrum of compound <b>4</b>                                                        |
| SI 11  | 2D NMR HMBC spectrum of compound <b>4</b>                                                        |
| SI 12  | <sup>1</sup> H NMR spectrum of compound <b>5</b> (4'- <i>O</i> -methylkaempferol)                |
| SI 13  | <sup>13</sup> C NMR spectrum of compound <b>5</b>                                                |
| SI 14  | <sup>1</sup> H NMR spectrum of compound <b>6</b> (5,7-dihydroxy-2',3',4',5'-tetramethoxyflavone) |
| SI 15  | <sup>13</sup> C NMR spectrum of compound <b>6</b>                                                |

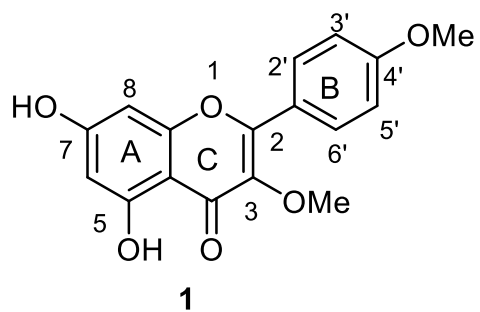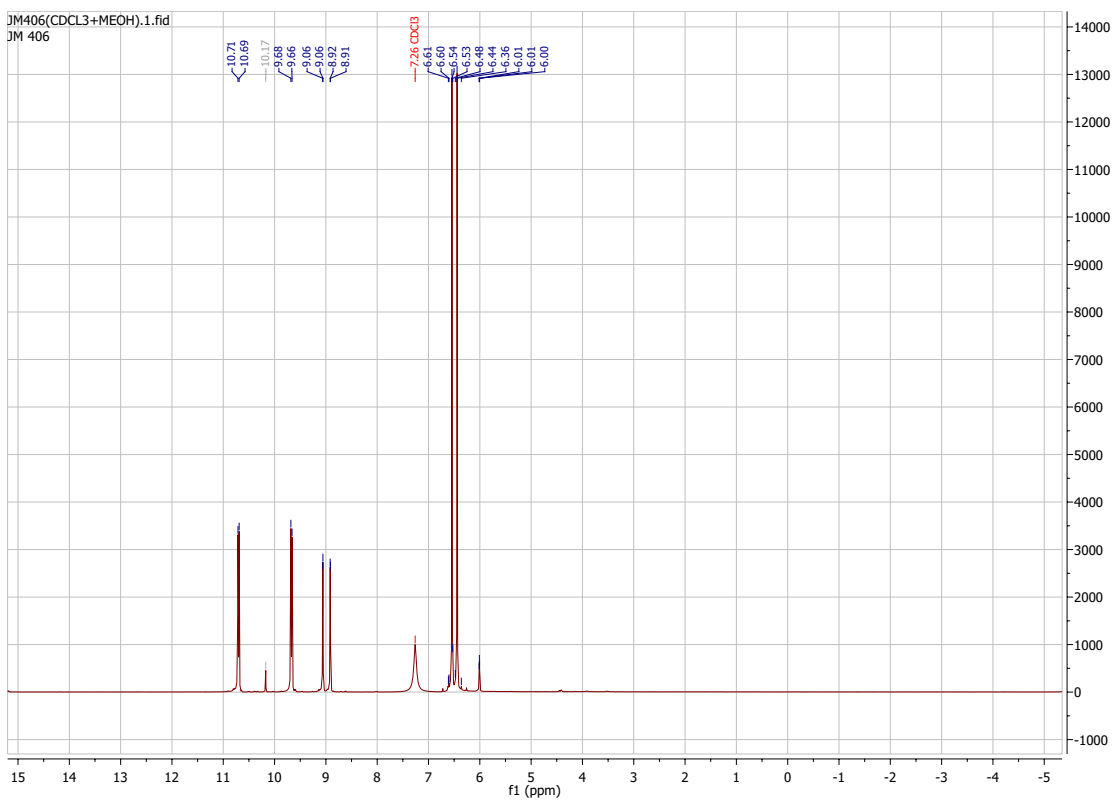

SI 1:  $^1\text{H}$  NMR spectrum of compound **1** (500 MHz,  $\text{CDCl}_3+\text{CD}_3\text{OD}$ )

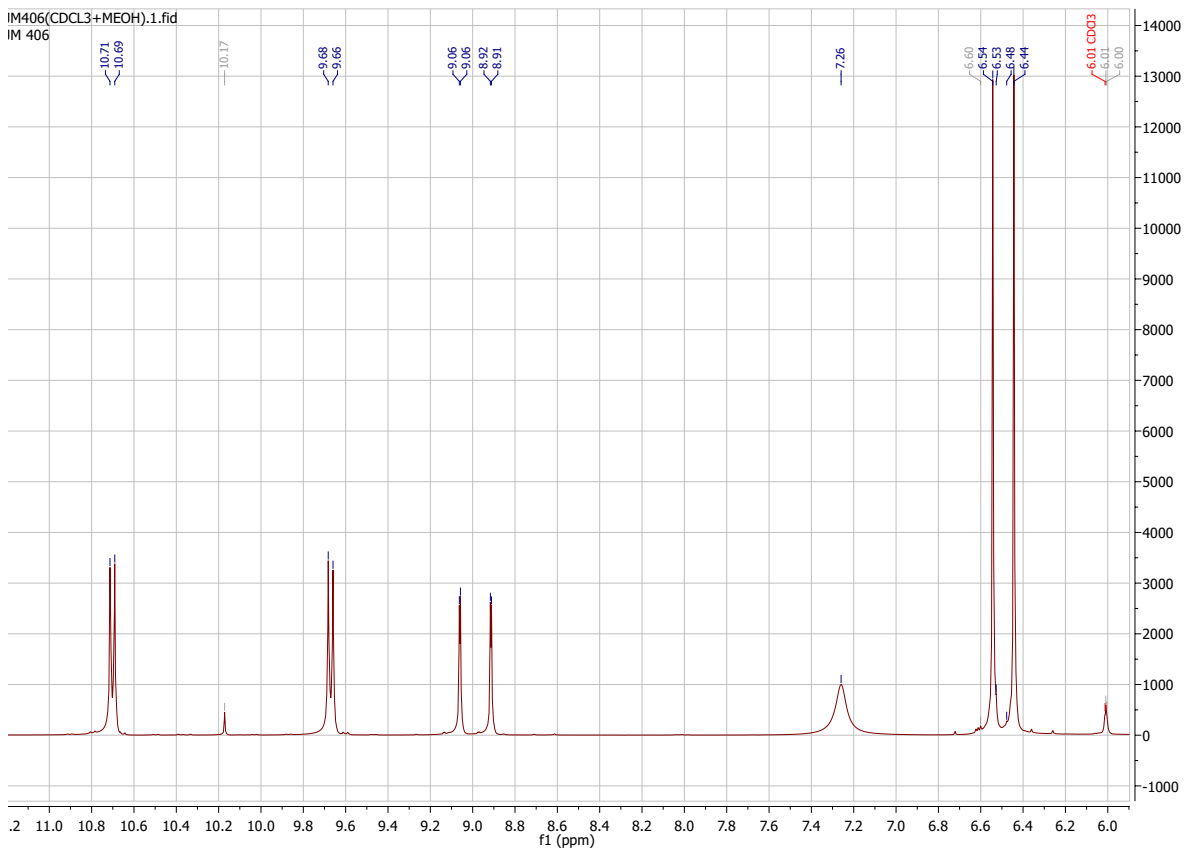

SI 1:  $^1\text{H}$  NMR spectrum of compound 1 (500 MHz,  $\text{CDCl}_3+\text{CD}_3\text{OD}$ )



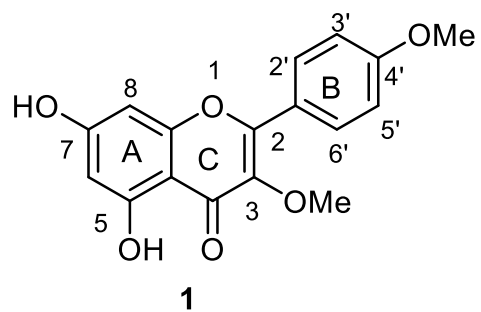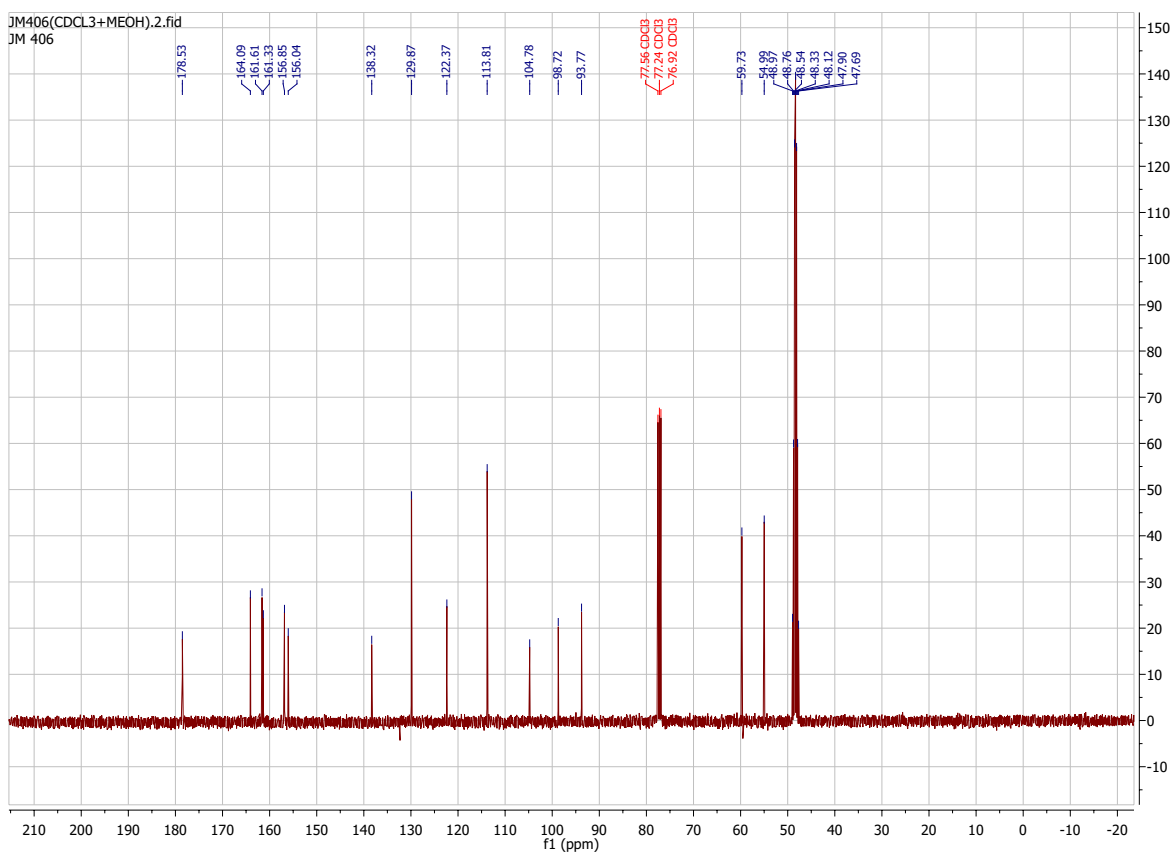

SI 2: <sup>13</sup>C NMR spectrum of compound **1** (125 MHz, CDCl<sub>3</sub>+CD<sub>3</sub>OD)

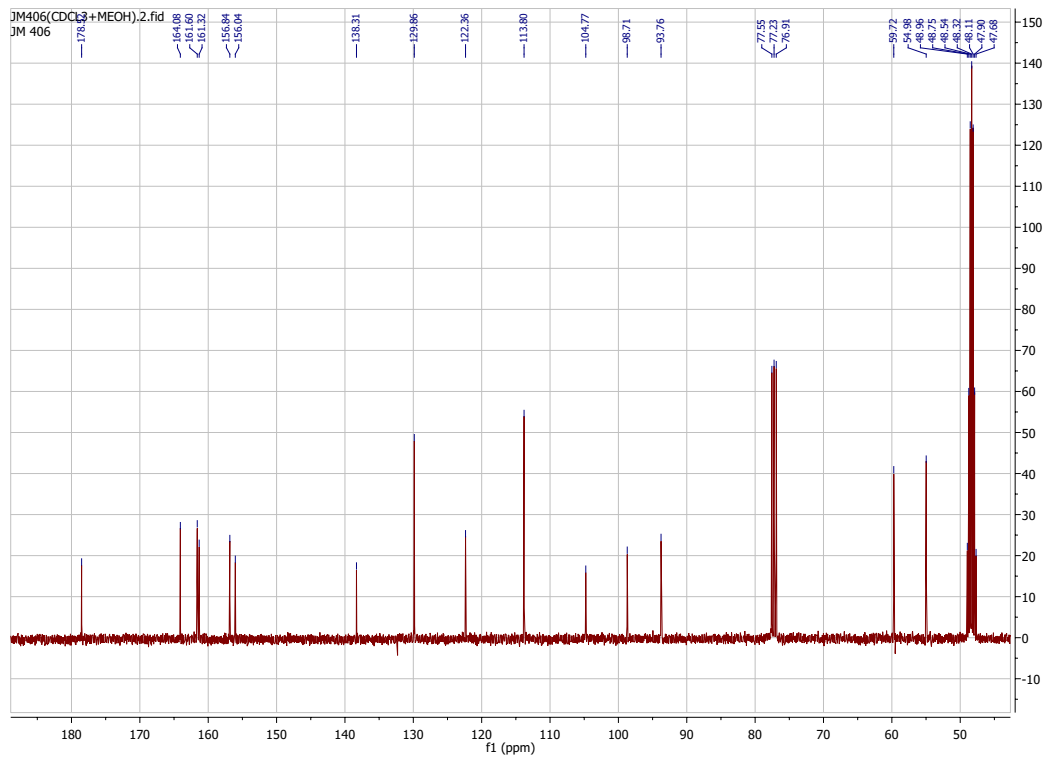

SI 2: <sup>13</sup>C NMR spectrum of compound 1 (125 MHz, CDCl<sub>3</sub>+CD<sub>3</sub>OD)

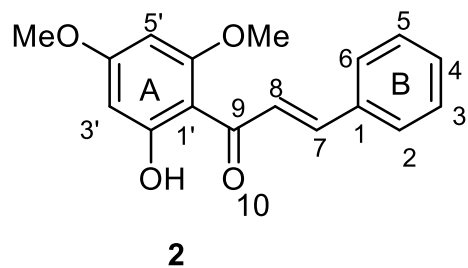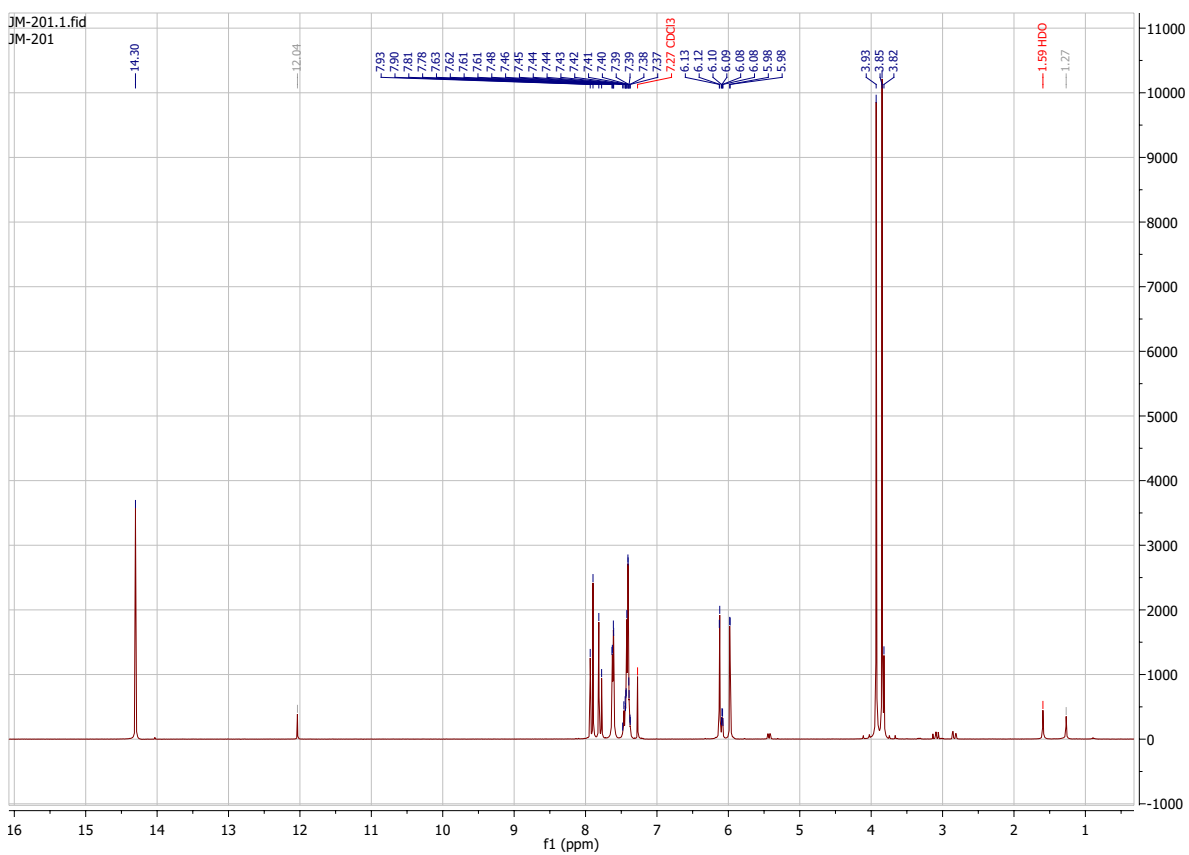

SI 3:  $^1\text{H}$  NMR spectrum of compound **2** (500 MHz,  $\text{CDCl}_3$ )

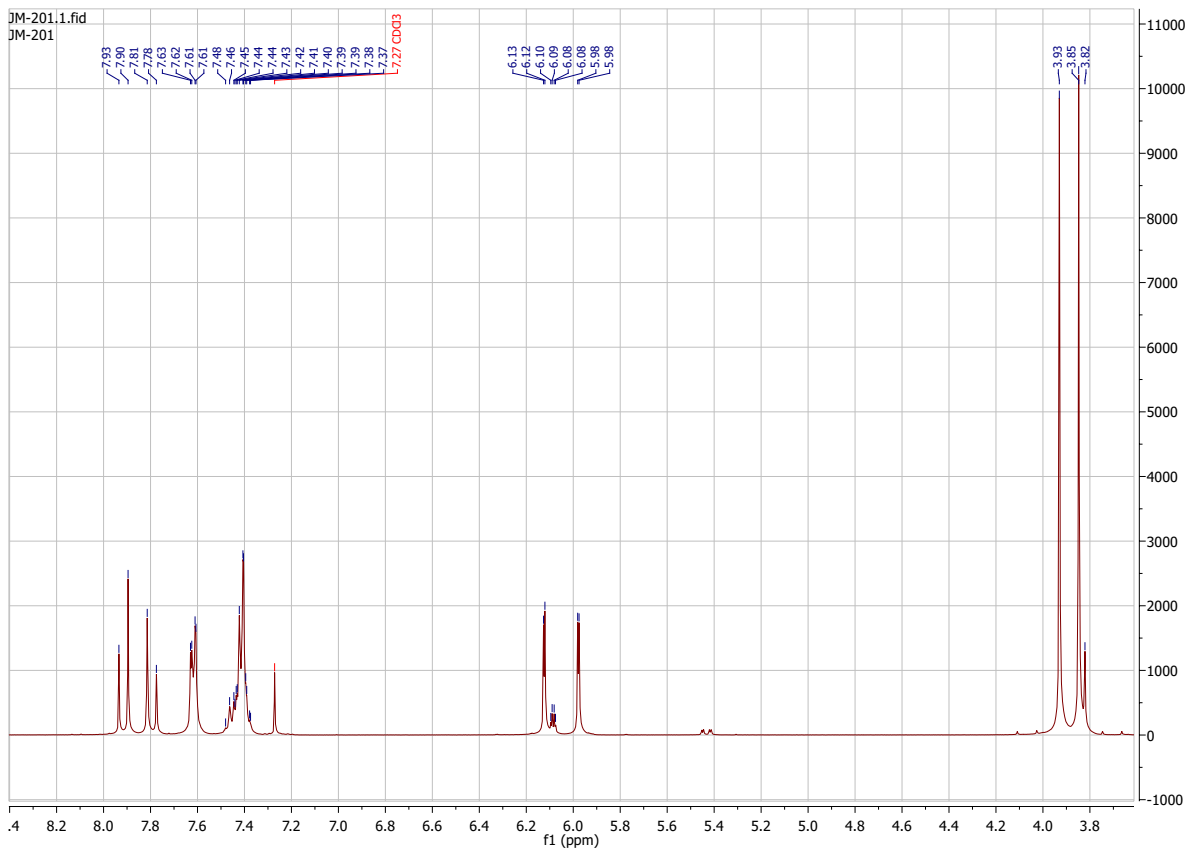

SI 3: <sup>1</sup>H NMR spectrum of compound 2 (500 MHz, CDCl<sub>3</sub>)

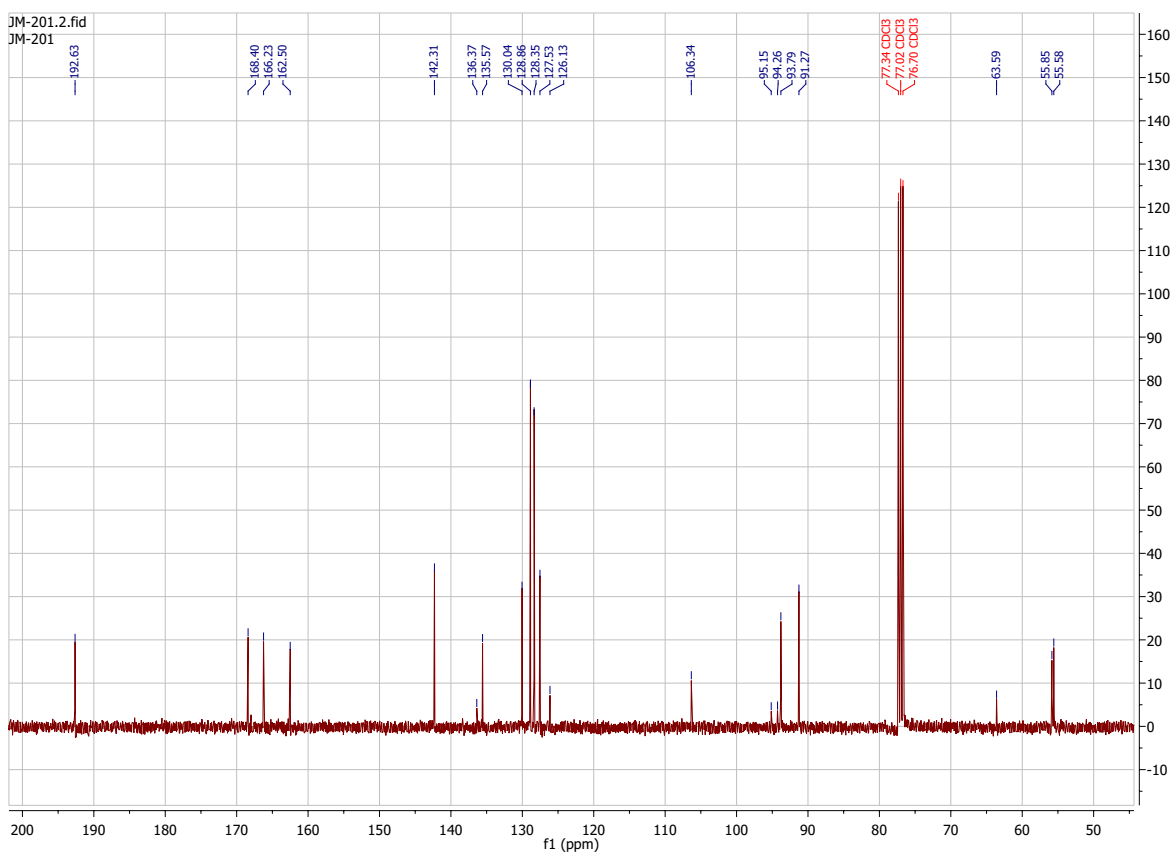

SI 4: <sup>13</sup>C NMR spectrum of compound 2 (125 MHz, CDCl<sub>3</sub>)

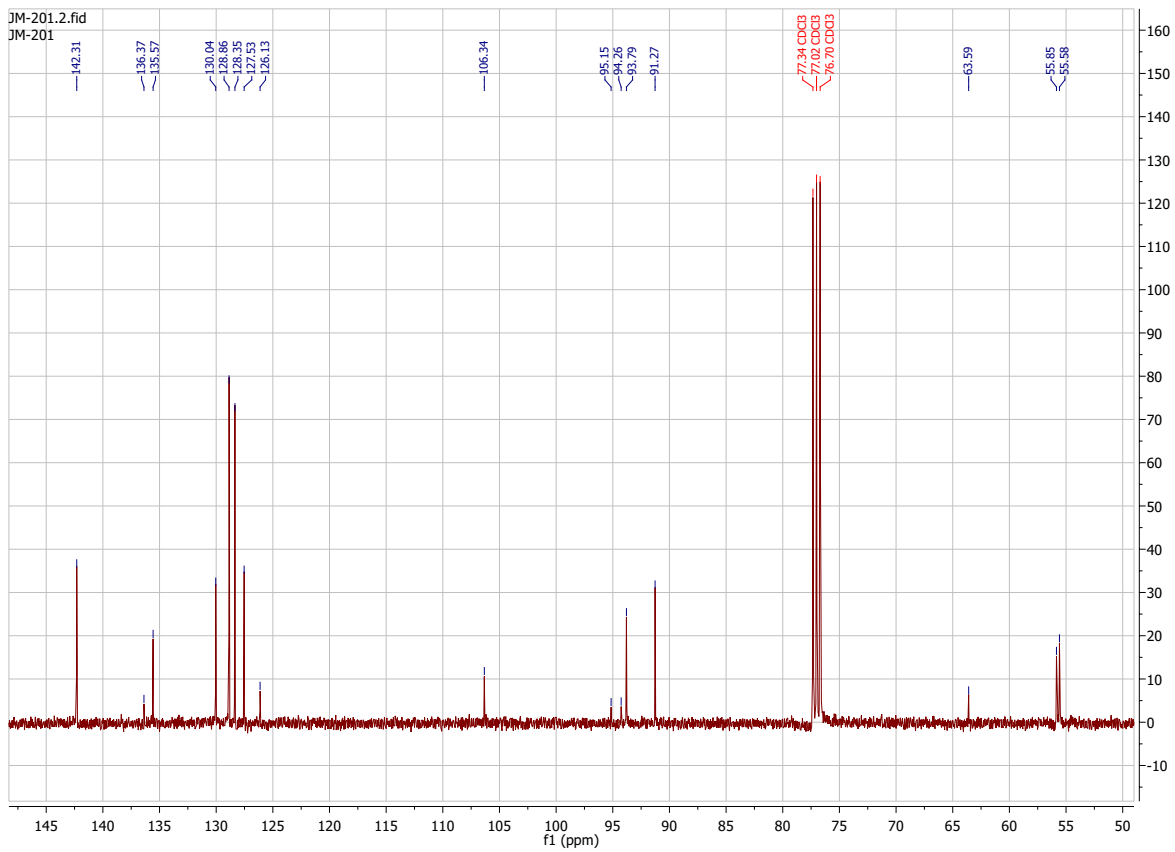

SI 4: <sup>13</sup>C NMR spectrum of compound 2 (125 MHz, CDCl<sub>3</sub>)

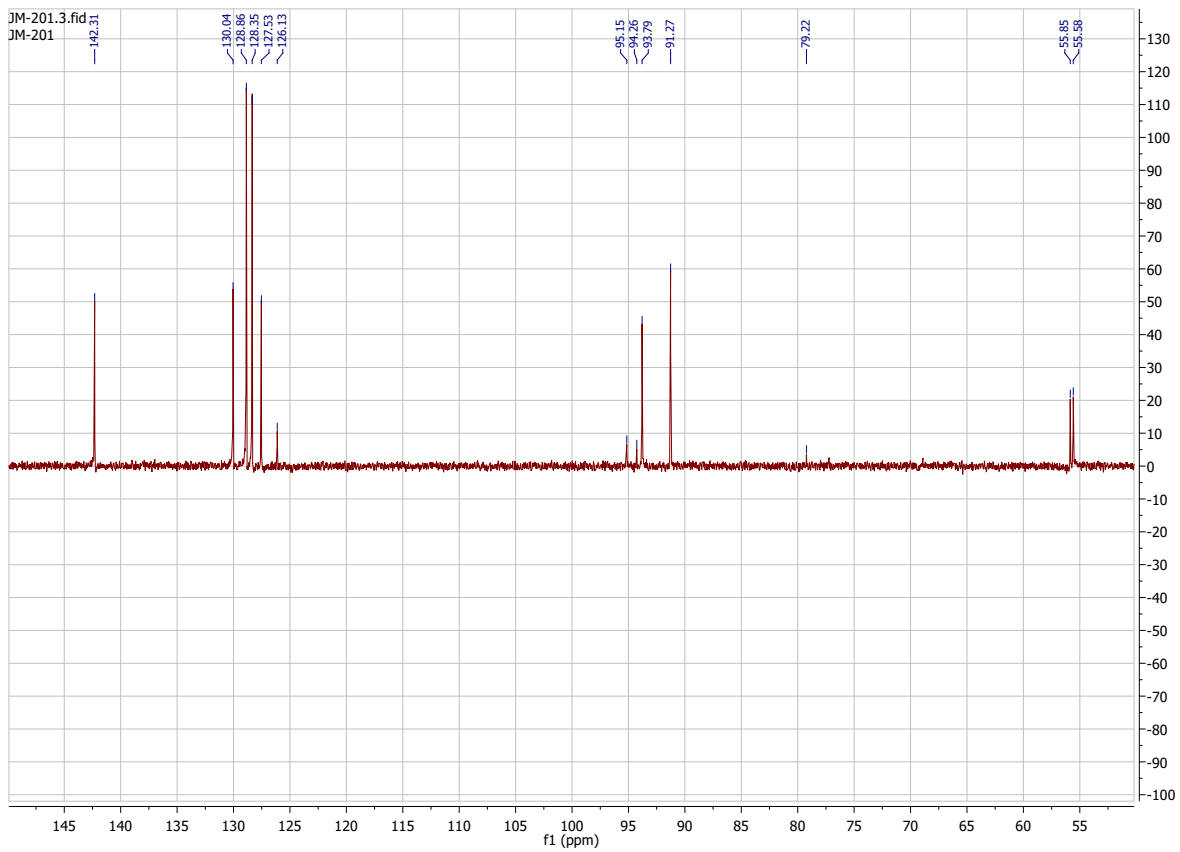

SI 4:  $^{13}\text{C}$  NMR DEPT spectrum of compound 2 (125 MHz,  $\text{CDCl}_3$ )

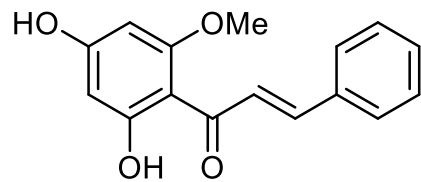

3

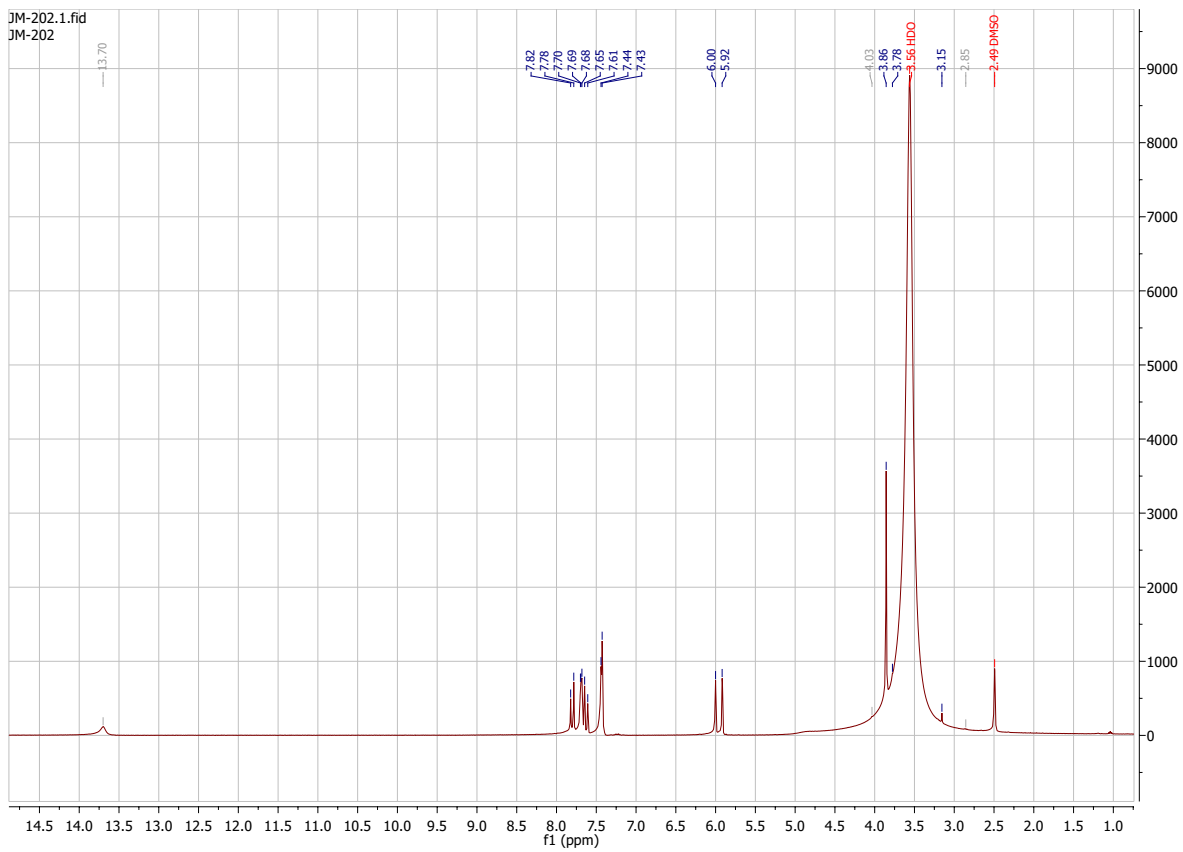

SI 5: <sup>1</sup>H NMR spectrum of compound 3 (500 MHz, CD<sub>3</sub>OD)



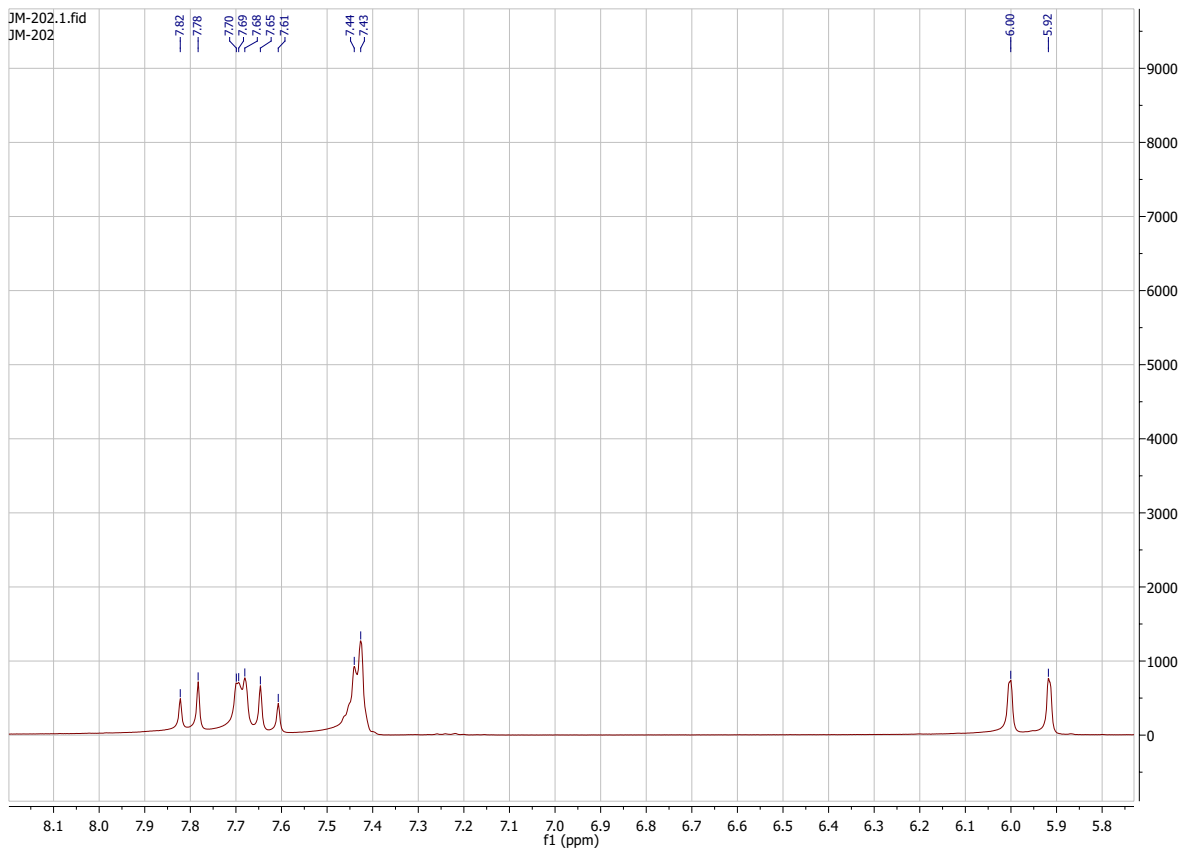

SI 5: <sup>1</sup>H NMR spectrum of compound 3 (500 MHz, CD<sub>3</sub>OD)

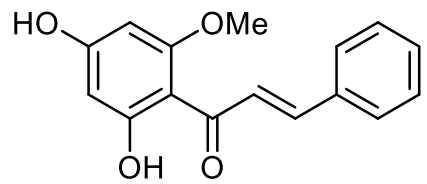

3

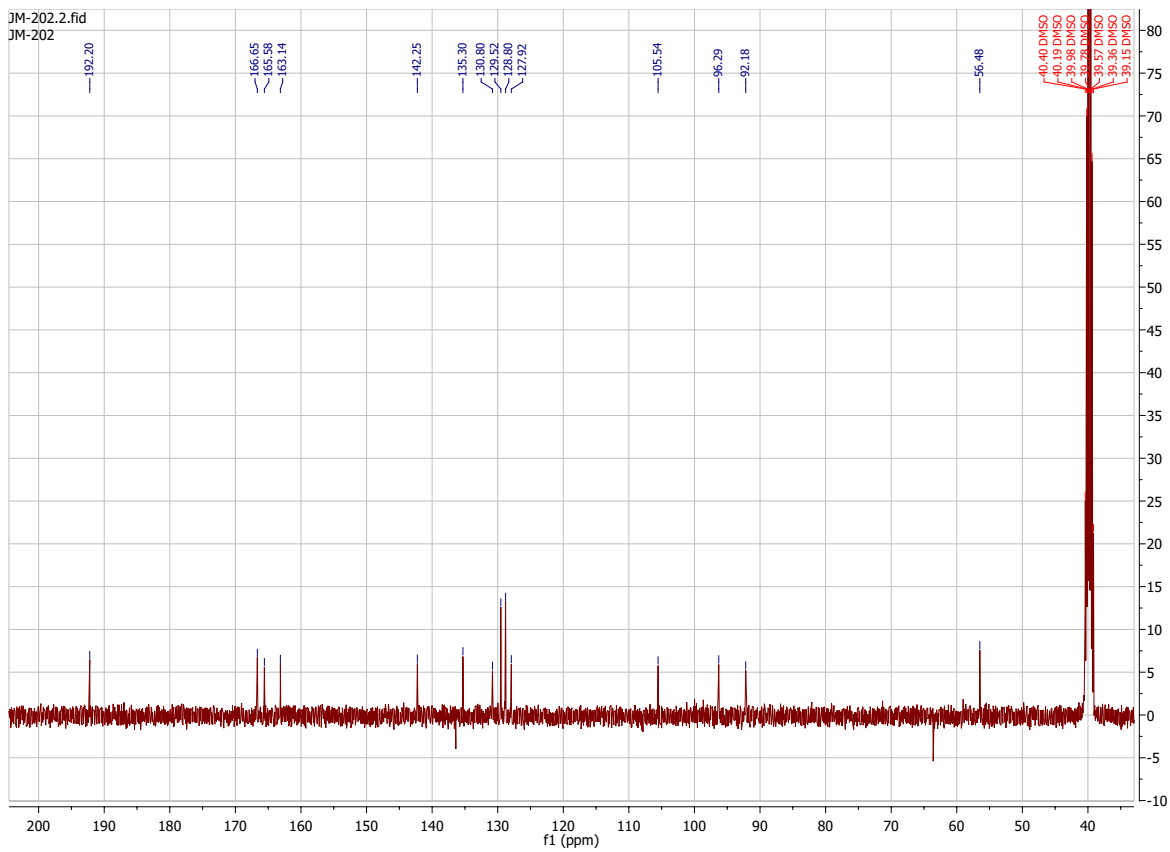

SI 6: <sup>13</sup>C NMR spectrum of compound 3 (125 MHz, CD<sub>3</sub>OD)

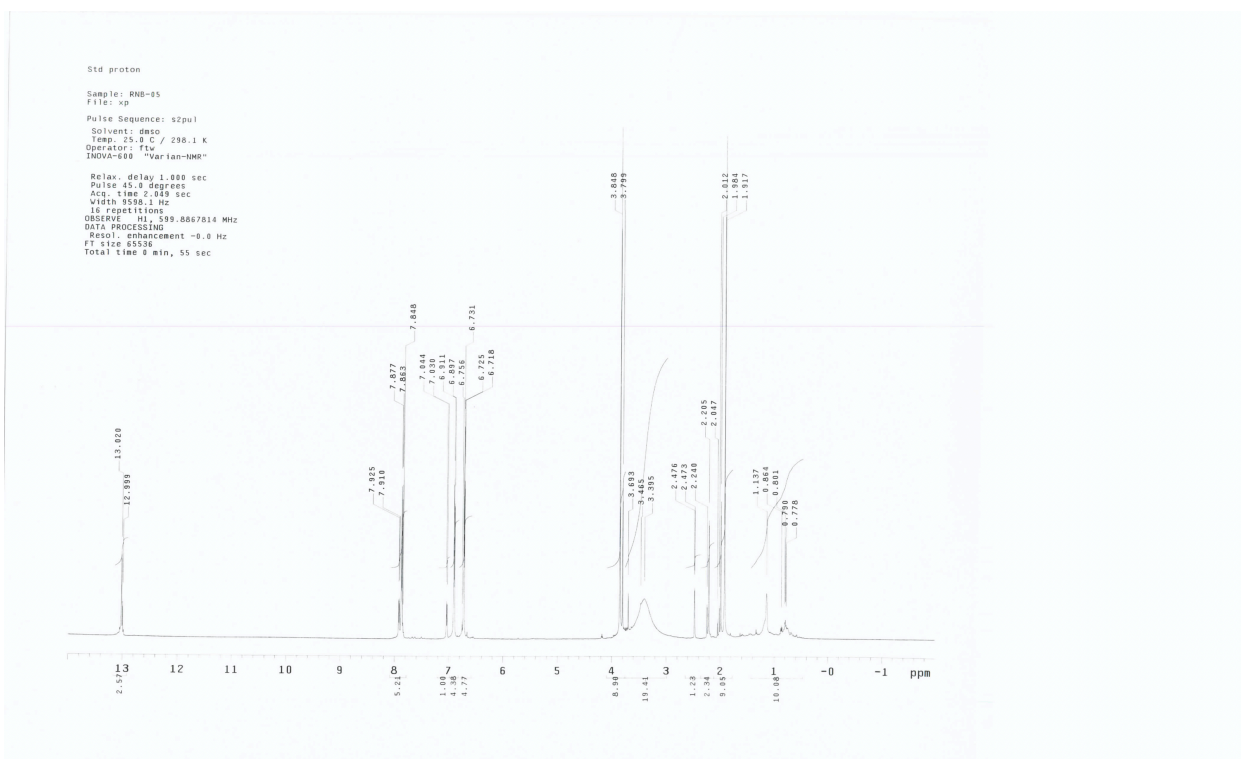

SI 7:  $^1\text{H}$  NMR spectrum of compound **4** (500 MHz,  $\text{CD}_3\text{OD}$ )

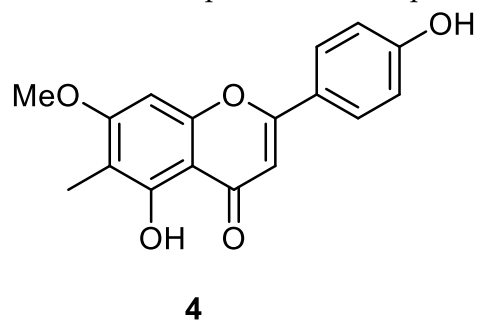

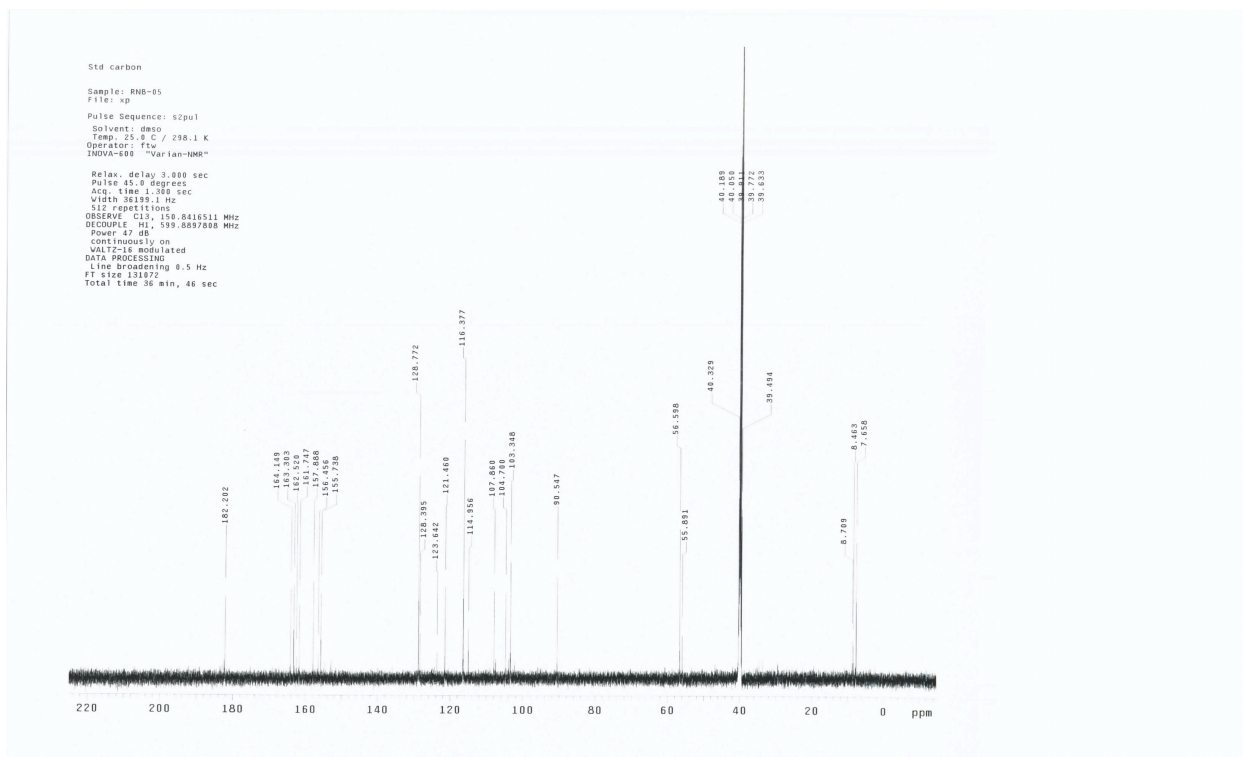

SI 8:  $^{13}\text{C}$  NMR spectrum of compound **4** (125 MHz,  $\text{CD}_3\text{OD}$ )

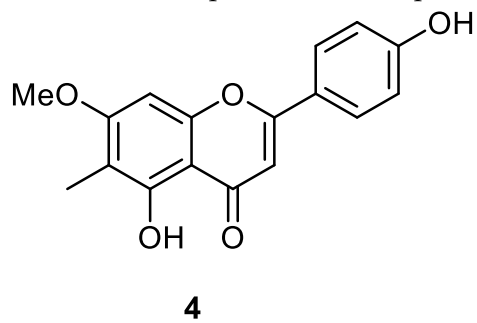

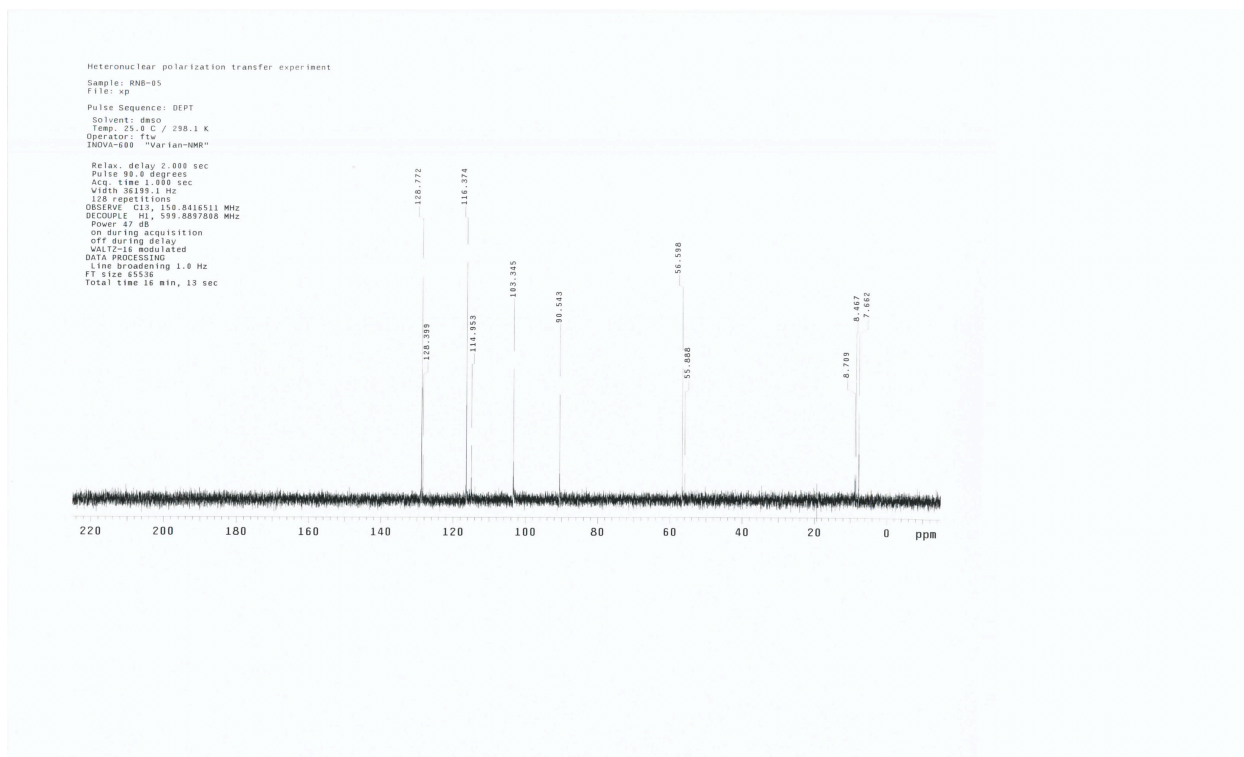

SI 8:  $^{13}\text{C}$  NMR spectrum of compound **4** (125 MHz,  $\text{CD}_3\text{OD}$ )

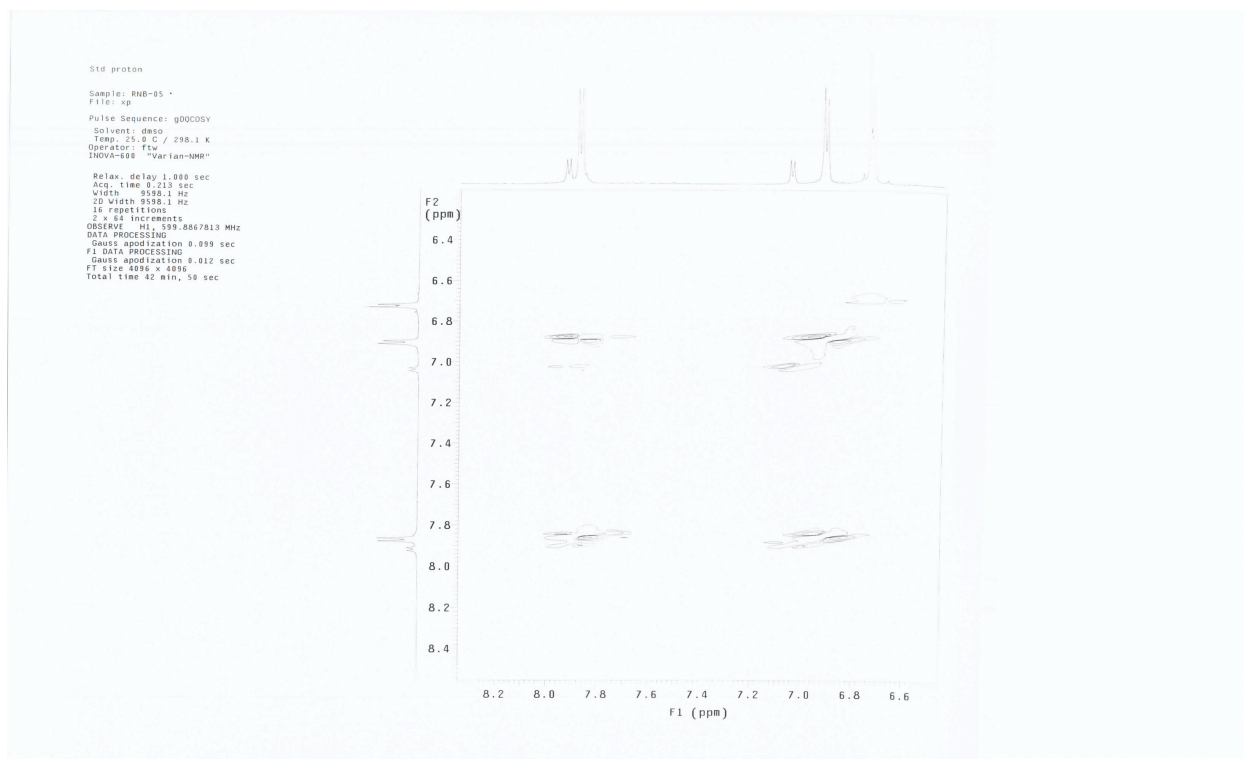

SI 9: 2D- NMR COSY spectrum of compound **4** (125 MHz, CD<sub>3</sub>OD)

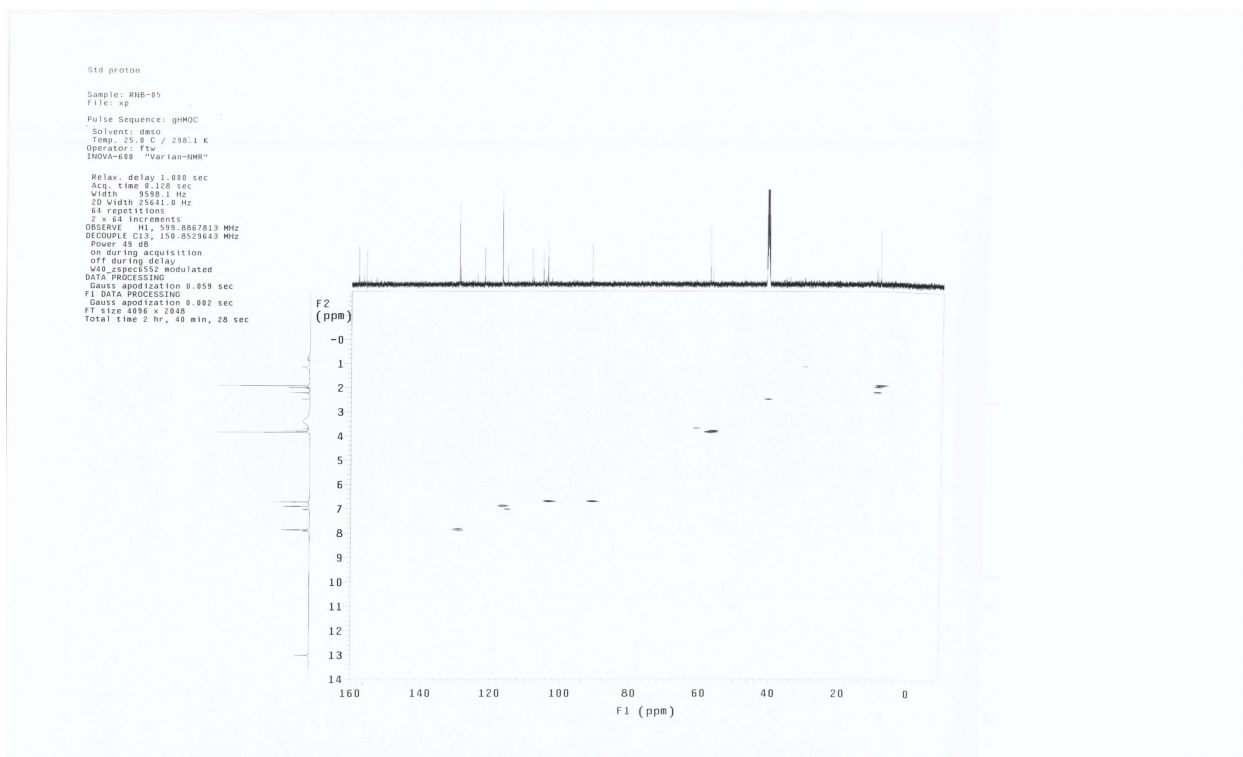

SI 10: 2D- NMR HMQC spectrum of compound 4 (500 MHz, CD<sub>3</sub>OD)

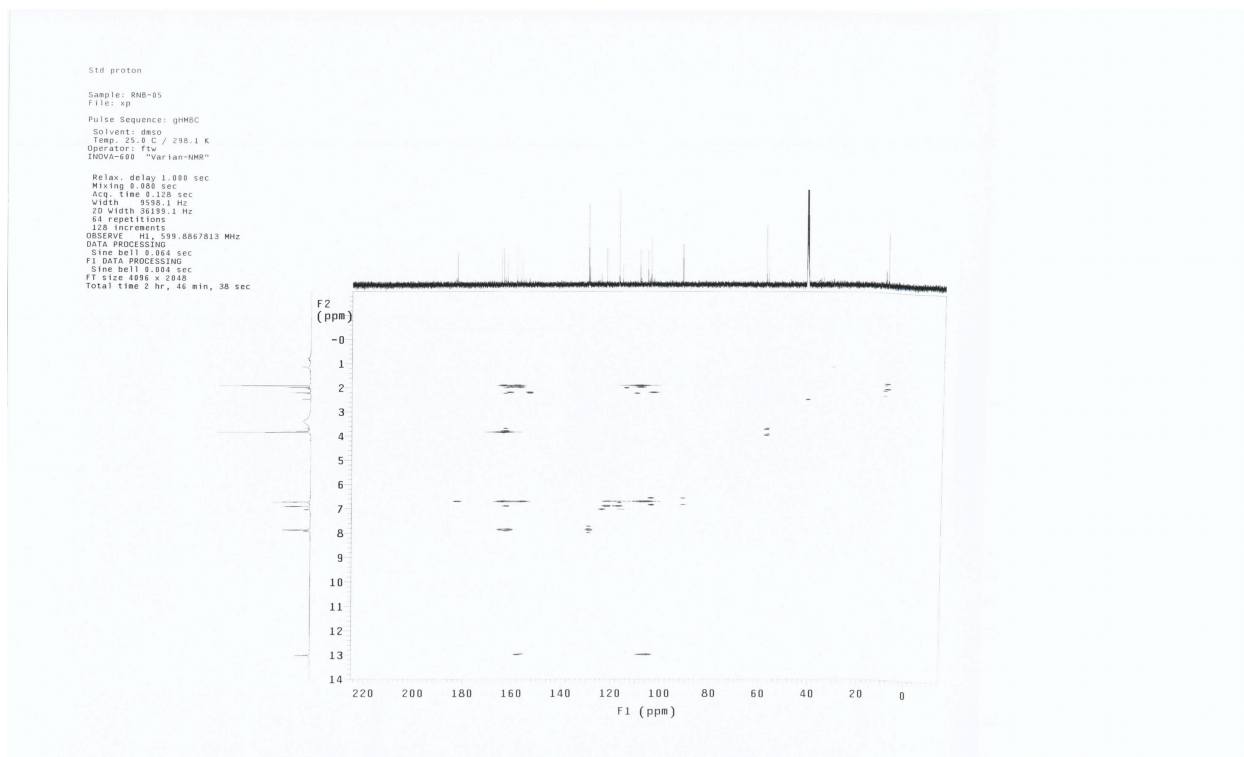

SI 11: 2D- NMR HMBC spectrum of compound **4** (500 MHz, CD<sub>3</sub>OD)



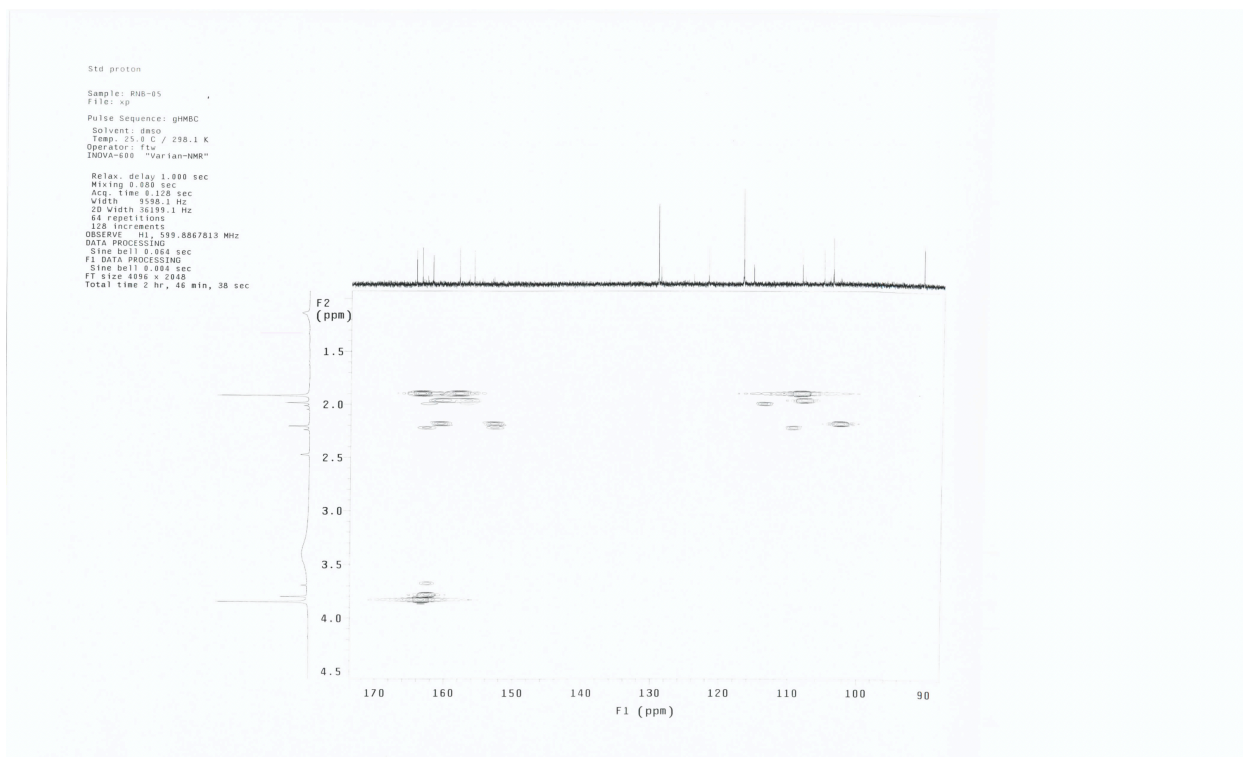

SI 11: 2D- NMR HMQC spectrum of compound 4 (500 MHz, CD<sub>3</sub>OD)

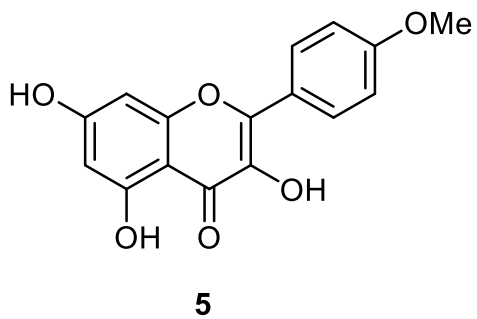

EOA-35P, <sup>1</sup>H-NMR, DMSO, Varian Mercury-400

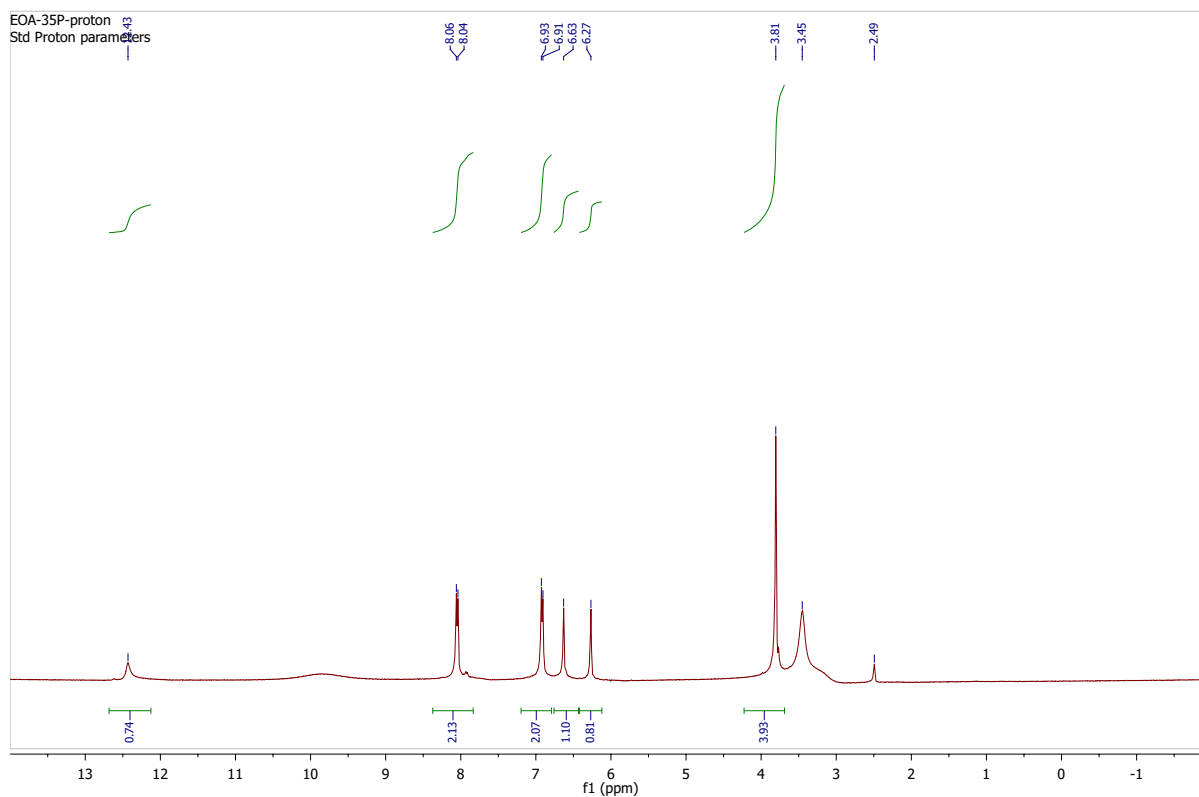

SI 12: <sup>1</sup>H NMR spectrum of compound **5** (500 MHz, CD<sub>3</sub>OD)

EOA-35P, 1H-NMR, DMSO, Varian Mercury-400

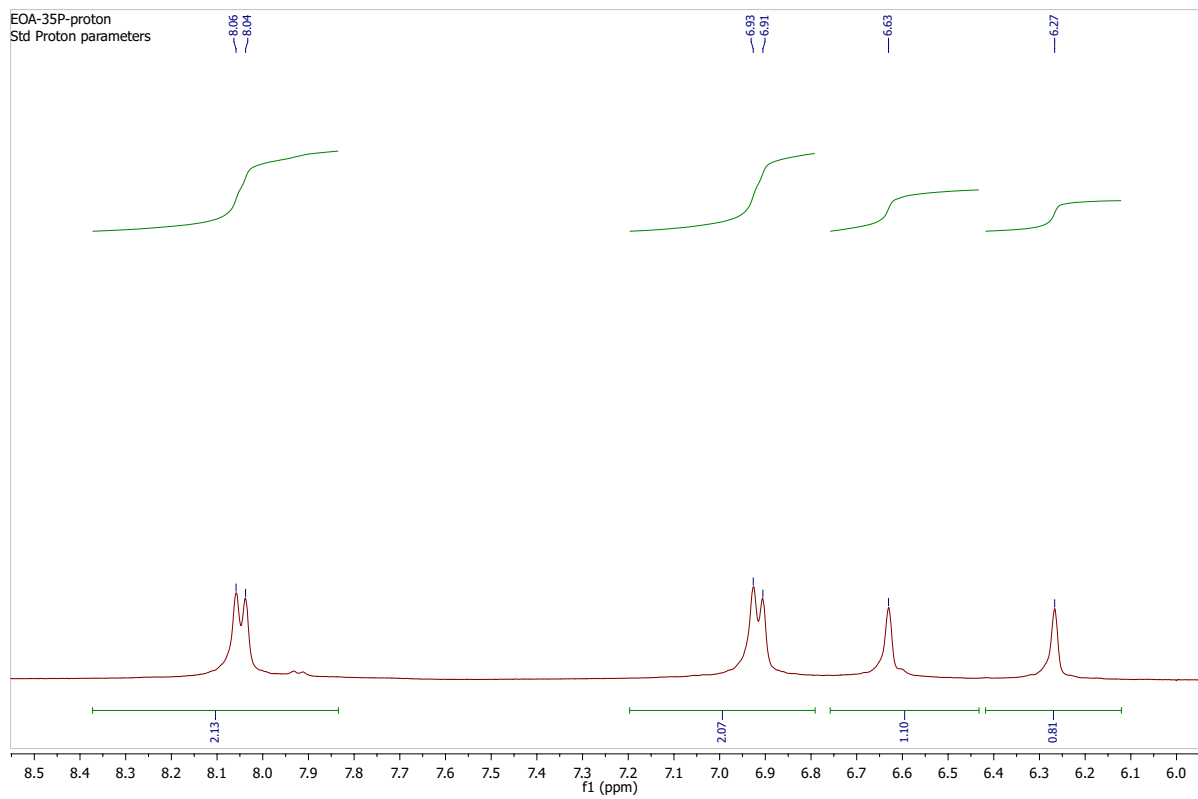

SI 12:  $^1\text{H}$  NMR spectrum of compound 5 (500 MHz,  $\text{CD}_3\text{OD}$ )

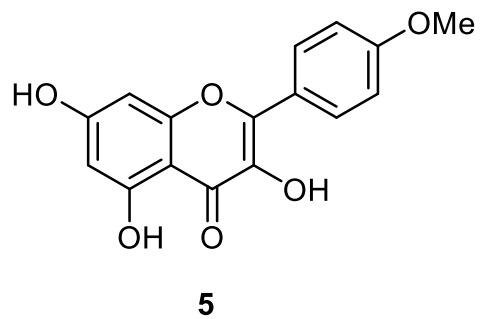

EOA-35P, 13C-NMR, DMSO, Varian Mercury-400

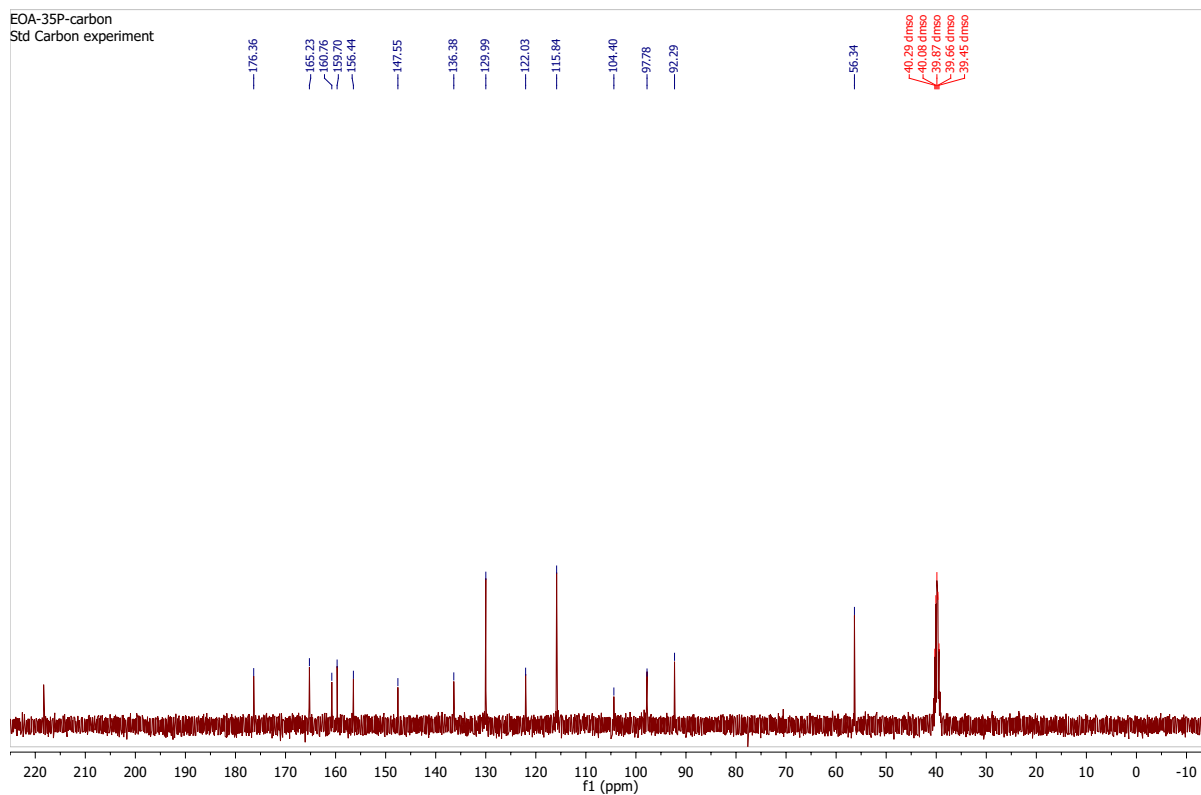

SI 13:  $^{13}\text{C}$  NMR spectrum of compound 5 (125 MHz,  $\text{CD}_3\text{OD}$ )

EOA-35P, DEPT-135, DMSO, Varian Mercury-400

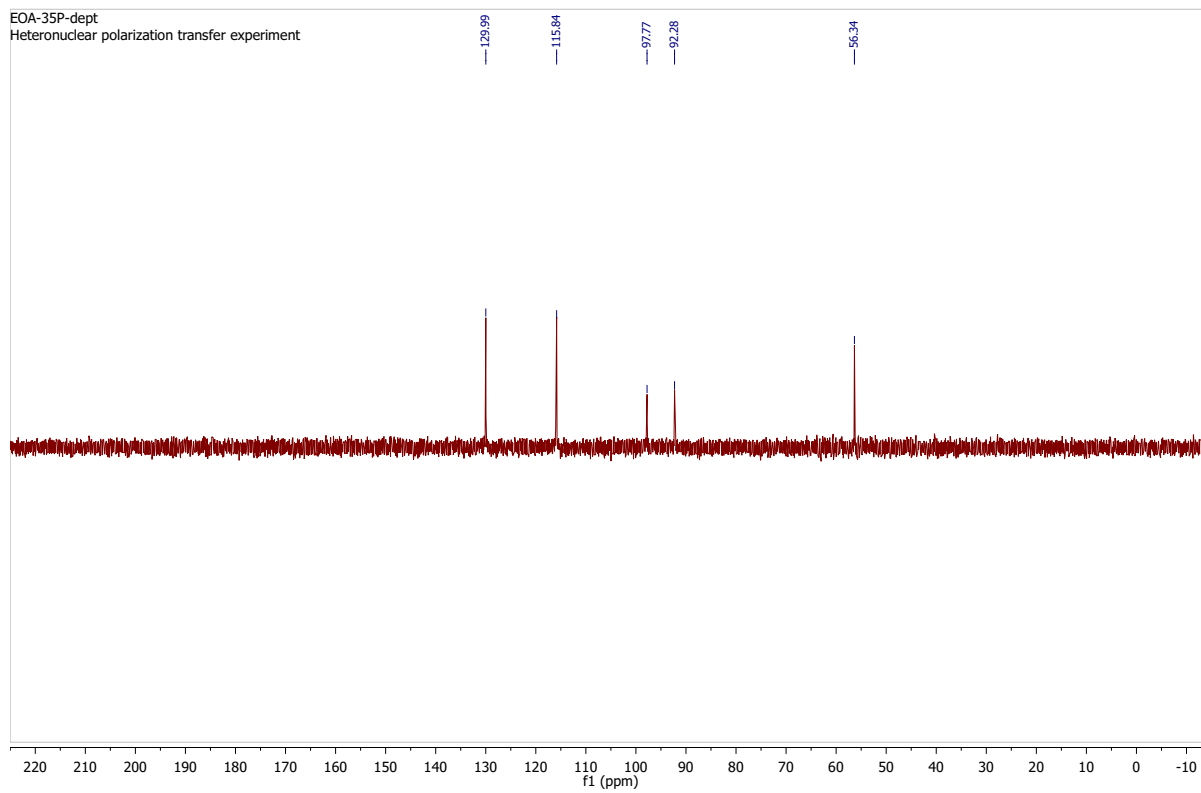

SI 13:  $^{13}\text{C}$  NMR DEPT spectrum of compound **5** (125 MHz,  $\text{CD}_3\text{OD}$ )

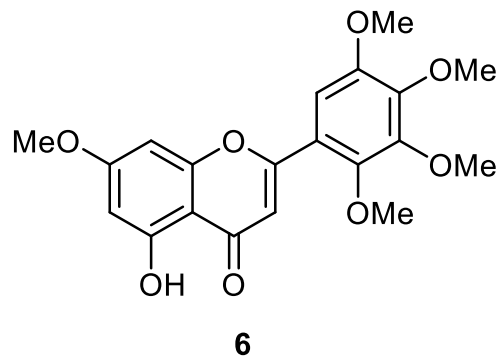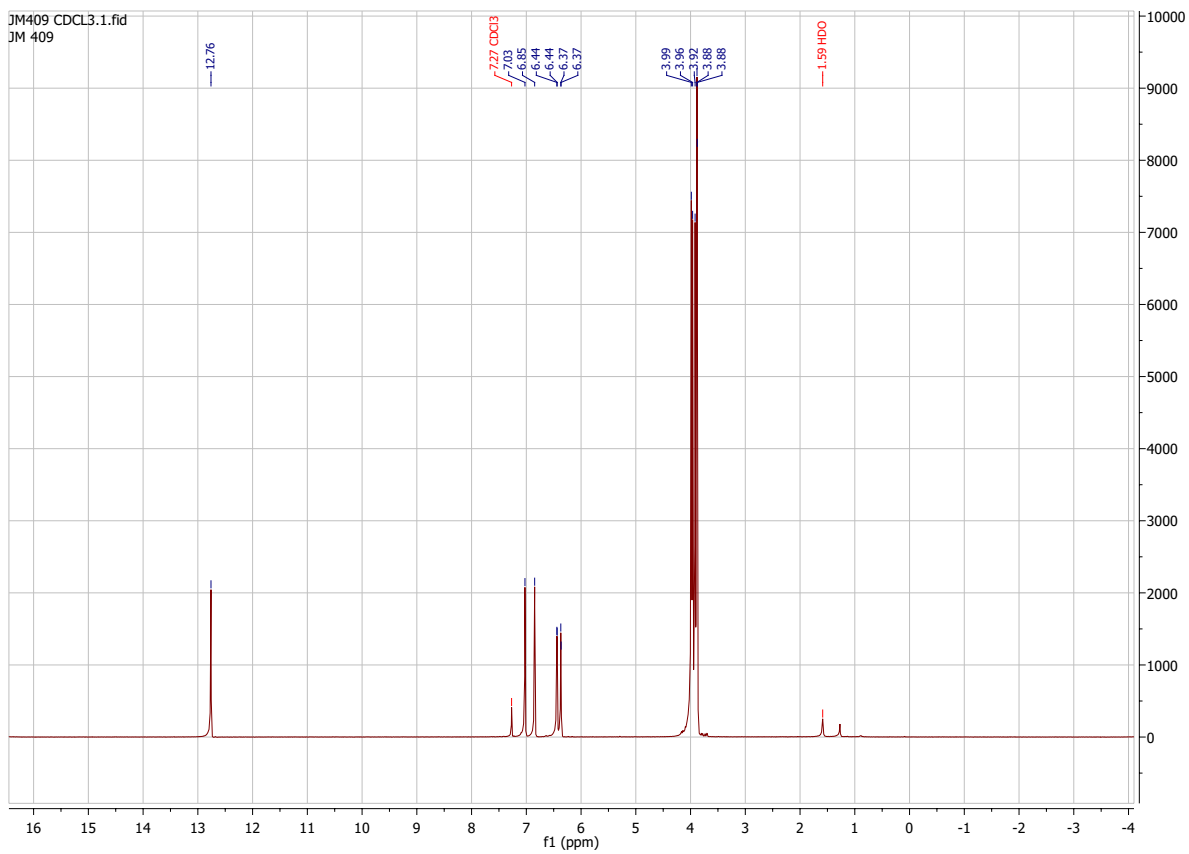

SI 14: <sup>1</sup>H NMR spectrum of compound 6 (500 MHz, CHCl<sub>3</sub>+CD<sub>3</sub>OD)

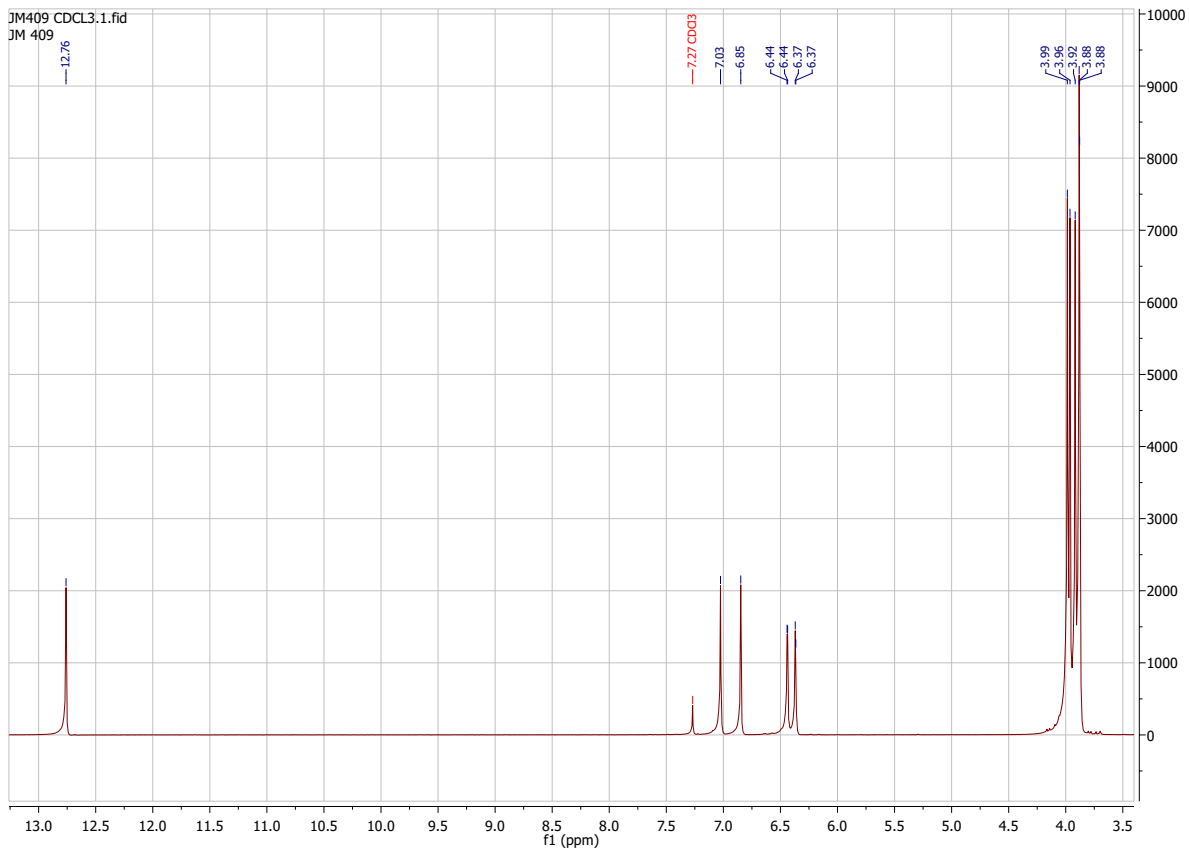

SI 14:  $^1\text{H}$  NMR spectrum of compound 6 (500 MHz,  $\text{CHCl}_3+\text{CD}_3\text{OD}$ )

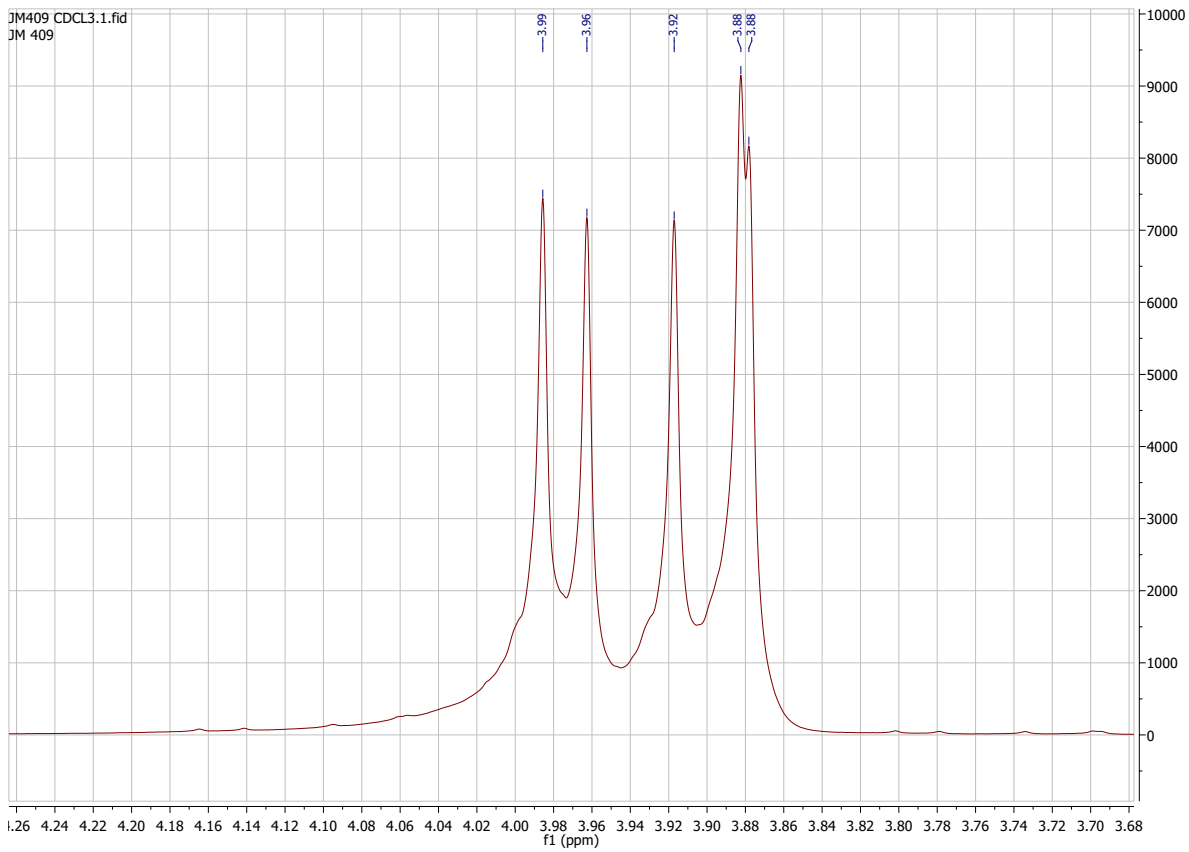

SI 14:  $^1\text{H}$  NMR spectrum of compound 6 (500 MHz,  $\text{CHCl}_3+\text{CD}_3\text{OD}$ )



JM409 CDCL3.2.fid  
JM 409

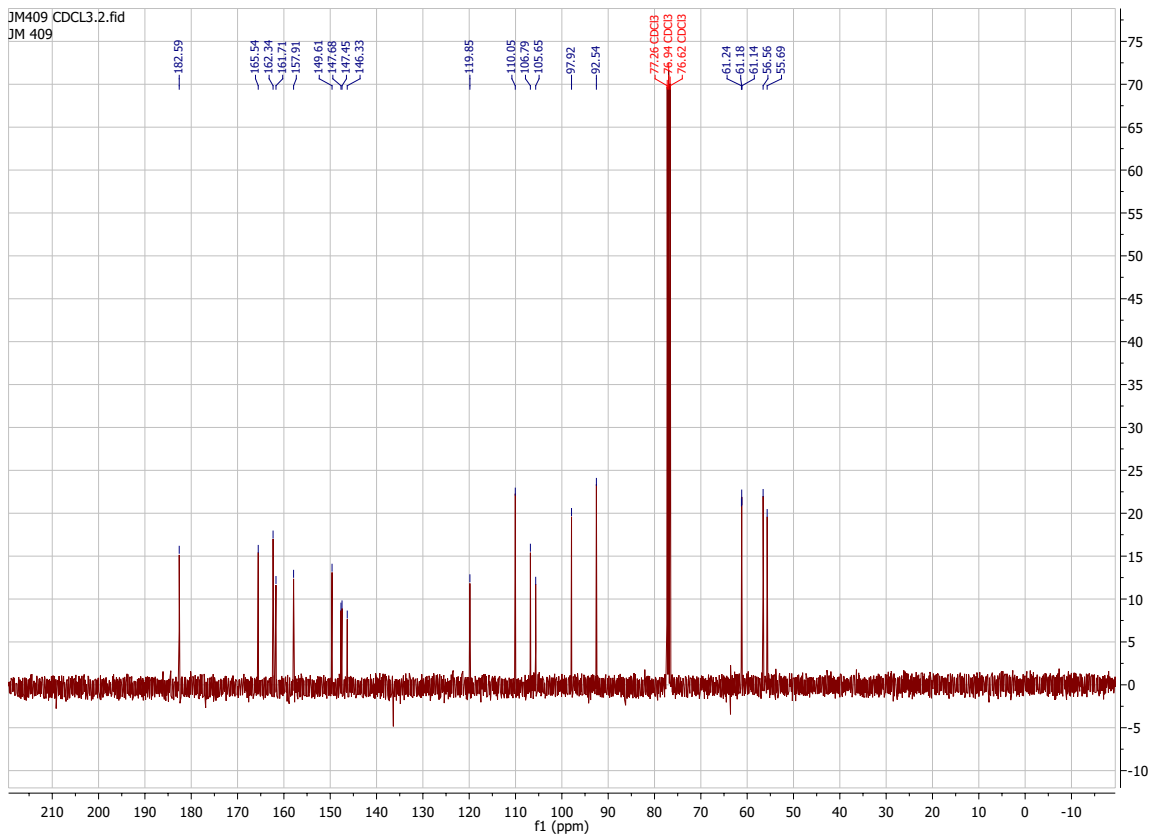

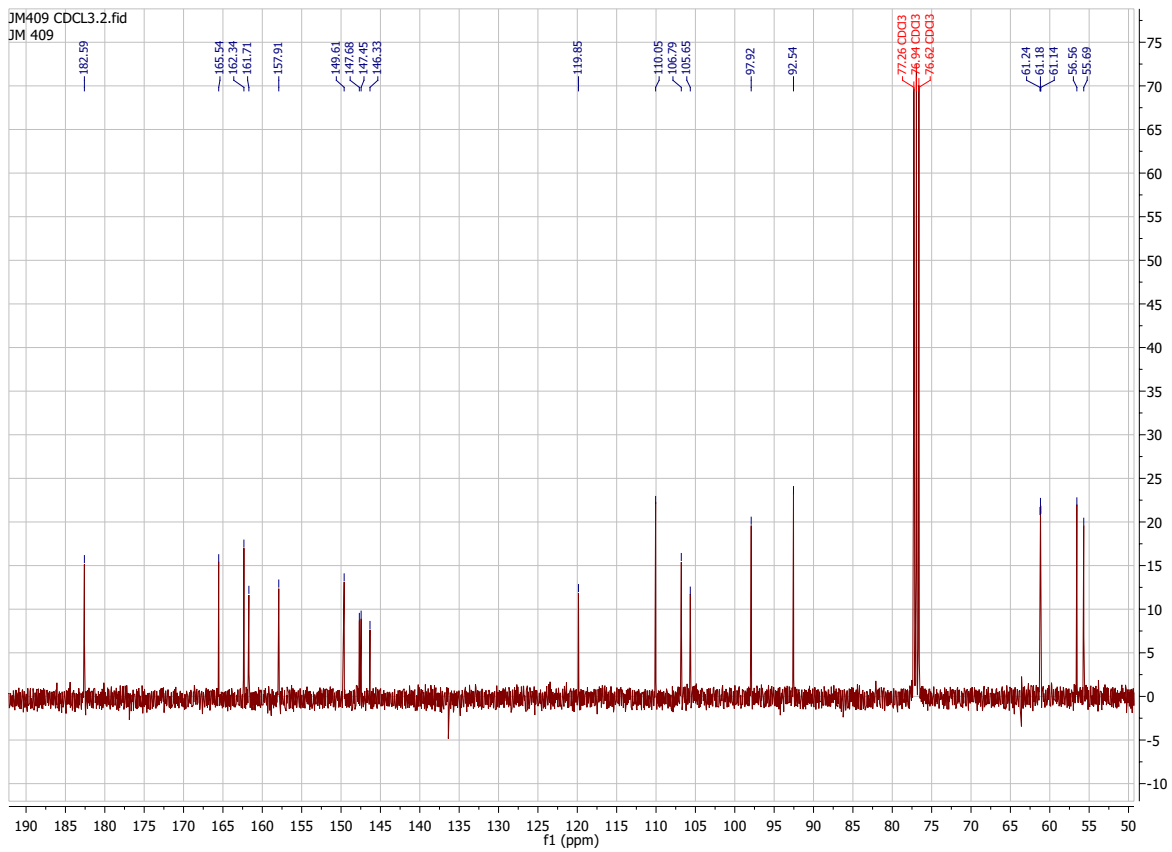

SI 15:  $^1\text{H}$  NMR spectrum of compound 6 (500 MHz,  $\text{CHCl}_3+\text{CD}_3\text{OD}$ )

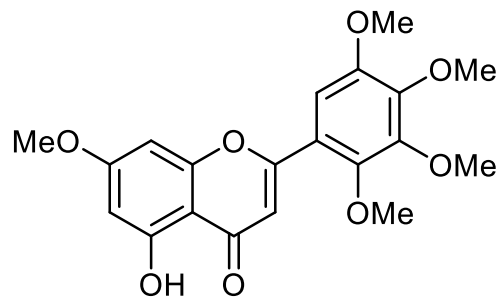

**6**

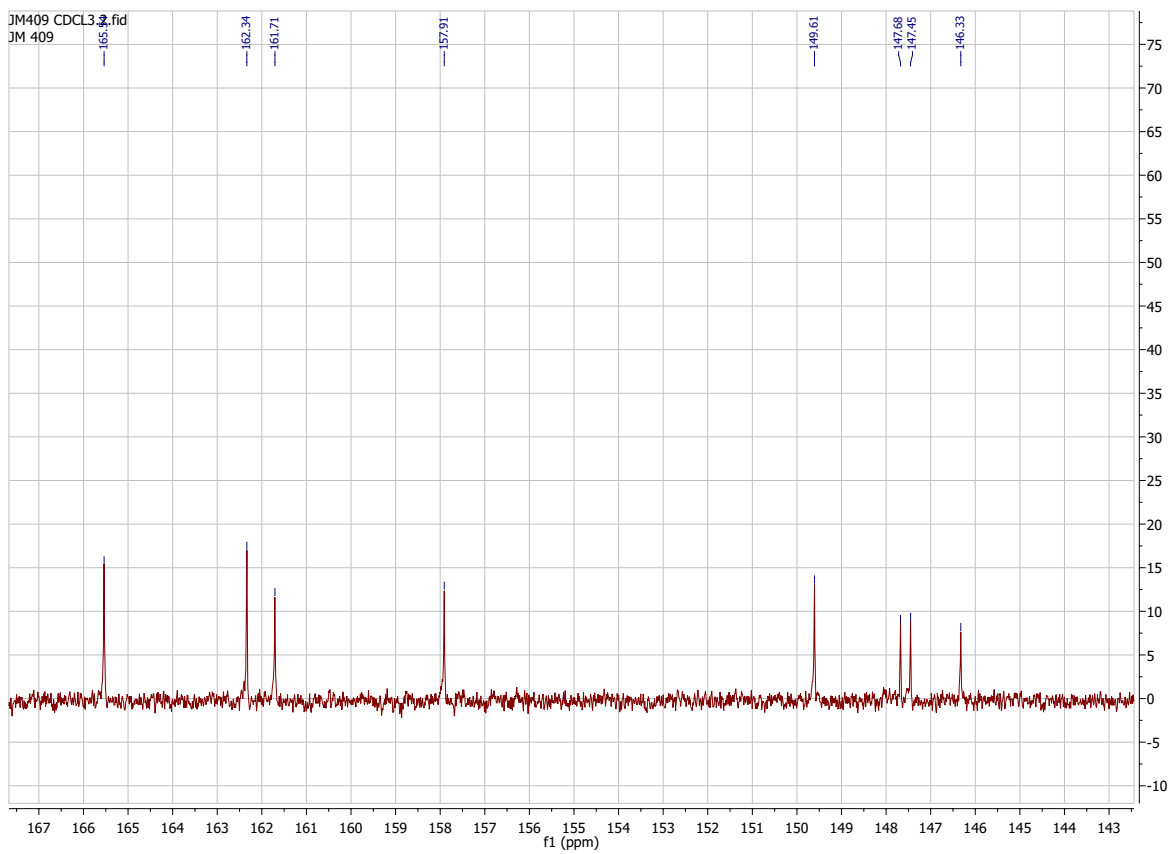

SI 15: <sup>13</sup>C NMR spectrum of compound **6** (500 MHz, CHCl<sub>3</sub>+CD<sub>3</sub>OD)

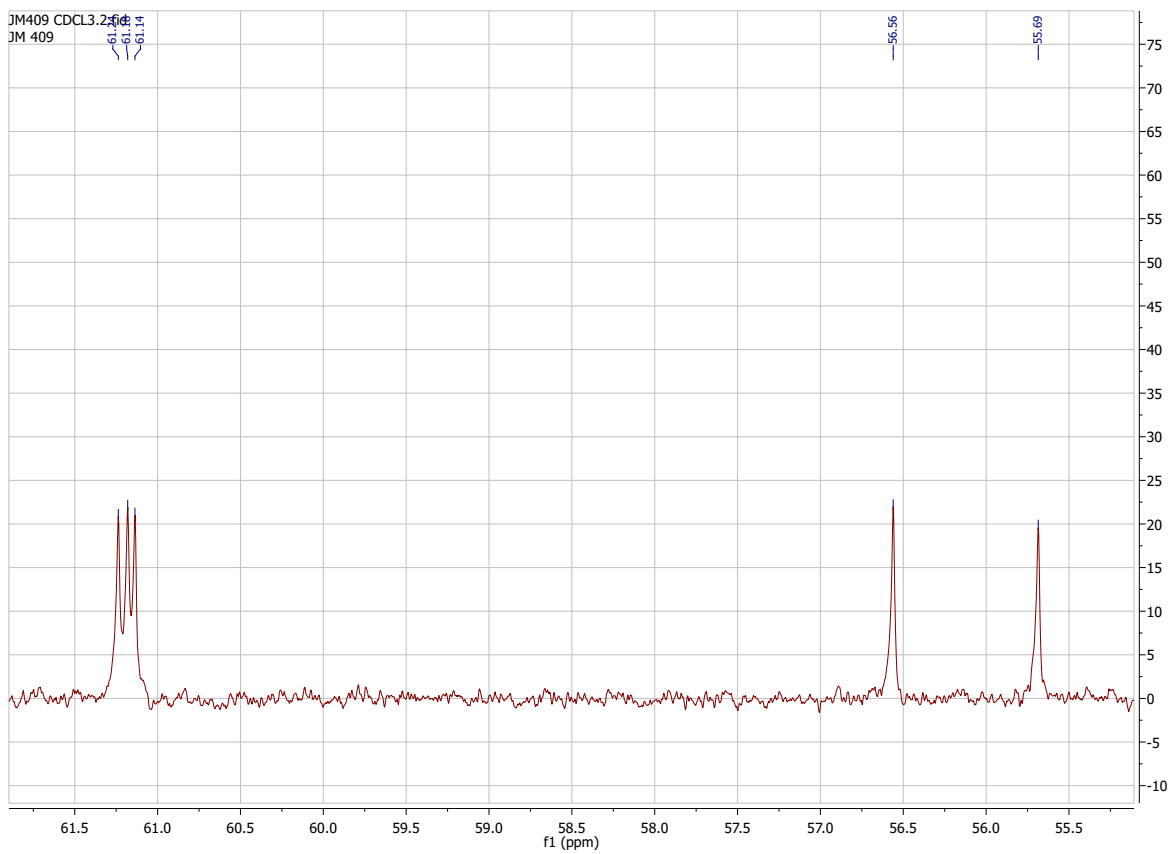

**SI 15:** <sup>13</sup>C NMR spectrum of compound **6** (125 MHz, CHCl<sub>3</sub>+CD<sub>3</sub>OD)
